# Supplementary material
Source: PubMed Central journal article supplement (PMC489990)
Supplement: pnas_101_29_10655__1.pdf [file pnas_101_29_10655__1.pdf]

**Table 1. Yeast strains**

| <b>Strain</b> | <b>Genotype</b>                                                                                                                                               | <b>Source</b> |
|---------------|---------------------------------------------------------------------------------------------------------------------------------------------------------------|---------------|
| YML192        | MAT mfa1::MFA1pr-HIS3 can1Δ ura3Δ0 leu2Δ0 his3Δ1<br>lys2Δ0 mad1Δ::NatMx                                                                                       | This study    |
| YML193        | MAT mfa1::MFA1pr-HIS3 can1Δ ura3Δ0 leu2Δ0 his3Δ1<br>lys2Δ0 mad2Δ::NatMx                                                                                       | This study    |
| YML194        | MAT mfa1::MFA1pr-HIS3 can1Δ ura3Δ0 leu2Δ0 his3Δ1<br>lys2Δ0 mad3Δ::NatMx                                                                                       | This study    |
| YFS1445       | MAT can1Δ::MFA1pr-HIS3:LEU2 ura3Δ0 leu2Δ0 his3Δ1<br>lys2Δ0 ura3Δ::NatMx                                                                                       | This study    |
| YFS589        | MATa ura3-52 lys2-801 ade2-101 trp1-63 his3-200 leu2-1                                                                                                        |               |
| YFS1329       | MATa ura3-52 lys2-801 ade2-101 trp1-63 his3-200 leu2-1<br>mad1Δ::NatMx                                                                                        | This study    |
| YFS1331       | MATa ura3-52 lys2-801 ade2-101 trp1-63 his3-200 leu2-1<br>mad2Δ::NatMx                                                                                        | This study    |
| YFS1333       | MATa ura3-52 lys2-801 ade2-101 trp1-63 his3-200 leu2-1<br>mad3Δ::NatMx                                                                                        | This study    |
| SBY772        | MATa ura3-1 leu2,3-112 his3-11:pCUP1-GFP12-<br>lacI12:HIS3 trp1-1:lacO:TRP1 ade2-1 can1-100 bar1Δ<br>cdc6:pGAL-UBI-R-CDC6:URA3 PDS1-myc18:LEU2                | 1             |
| YML232        | MATa ura3-1 leu2,3-112 his3-11:pCUP1-GFP12-<br>lacI12:HIS3 trp1-1:lacO:TRP1 ade2-1 can1-100 bar1Δ<br>cdc6:pGAL-UBI-R-CDC6:URA3 PDS1-myc18:LEU2<br>mad1::NatMx | This study    |
| YML233        | MATa ura3-1 leu2,3-112 his3-11:pCUP1-GFP12-<br>lacI12:HIS3 trp1-1:lacO:TRP1 ade2-1 can1-100 bar1Δ<br>cdc6:pGAL-UBI-R-CDC6:URA3 PDS1-myc18:LEU2<br>mad2::NatMx | This study    |
| YML234        | MATa ura3-1 leu2,3-112 his3-11:pCUP1-GFP12-                                                                                                                   | This study    |

| Strain | Genotype                                                                                                       | Source |
|--------|----------------------------------------------------------------------------------------------------------------|--------|
|        | lac112:HIS3 trp1-1:lacO:TRP1 ade2-1 can1-100 bar1Δ<br>cdc6:pGAL-UBI-R-CDC6:URA3 PDS1-myc18:LEU2<br>mad3::NatMx |        |

1. Biggins, S. & Murray, A. W. (2001) *Genes Dev.* **15**, 3118-3129.
